# Supplementary material
Source: PubMed Central journal article supplement (PMC6727469)
Supplement: Supp_FigureS1.pdf [file Supp_FigureS1.pdf]

## Supplementary Data

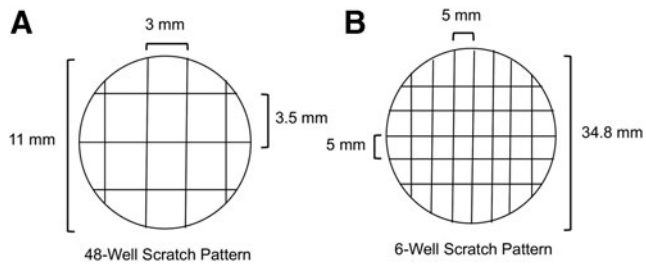

**SUPPLEMENTARY FIG. S1.** Scratch wound model of *in vitro* spinal neuron injury. (A) Demonstration and measurements of the scratch patterns applied to spinal neurons in 48-well and (B) six-well culture plates. All measurements in millimeters (mm).
