# Supplementary material
Source: PubMed Central journal article supplement (PMC6727469)
Supplement: Supp_FigureS2.pdf [file Supp_FigureS2.pdf]

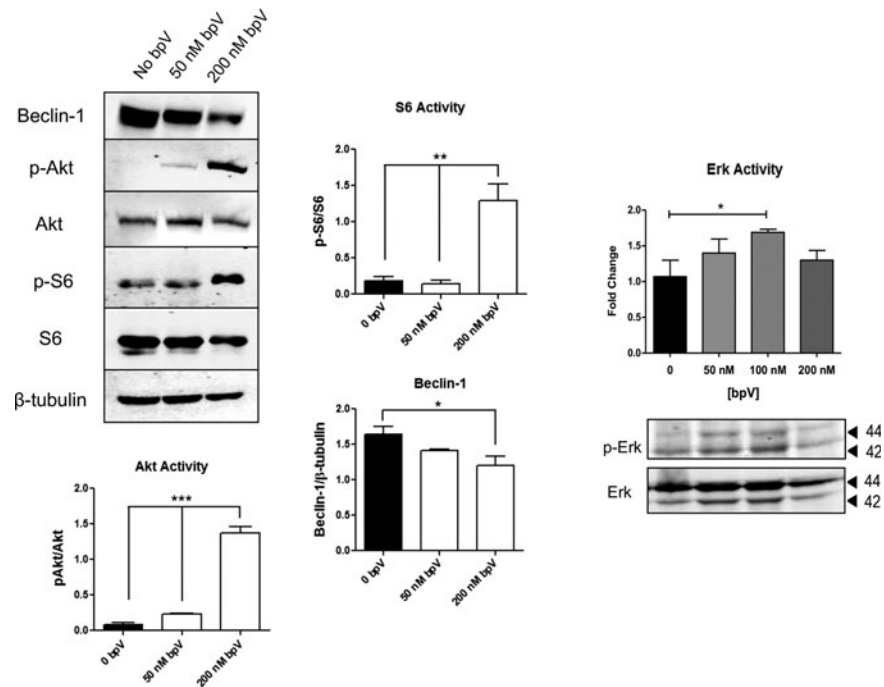

**SUPPLEMENTARY FIG. S2.** Bisperoxovanadium (bpV) enhanced prosurvival kinase/mammalian target of rapamycin (Akt/mTOR) and extracellular signal-related kinase (Erk) activity in differentiated PC12 cells. Supporting mechanistic data for this study in PC12 cells. Increasing concentrations of bpV increase Akt and ribosomal protein S6 phosphorylation, as well as downregulation of the autophagy-associated protein, Beclin 1. The Erk activity was also increased at 100 nM bpV, which was the concentration used in this study. Data were expressed as mean  $\pm$  standard error of the mean;  $n = 3$  experiments. All data analyzed via one-way analysis of variance; \* $p < 0.05$ ; \*\* $p < 0.01$ ; \*\*\* $p < 0.001$ .
